# Supplementary material for: Hierarchical genetic interactions between FOXG1 and LHX2 regulate the formation of the cortical hem in the developing telencephalon
Source: PubMed Central journal article supplement (PMC5825872; doi:10.1242/dev.154583), 2018-01-01
Supplement: DEV154583supp.pdf [file DEV154583supp.pdf]

## Supplementary Figures

Figure S1

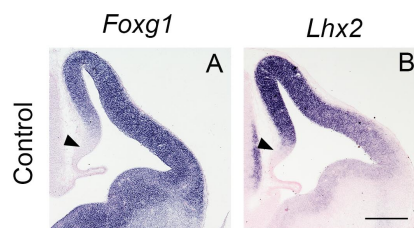

**Figure S1: Expression of *Foxg1* and *Lhx2* at E12.5 in control embryos.** (A,B) shows the expression pattern of *Foxg1* and *Lhx2*, excludes the hem (arrowheads) in control brain sections at E12.5. (A) *Foxg1* is expressed in the medial and lateral dorsal telencephalic neuroepithelium. (B) *Lhx2* is expressed in a medial (high), lateral (low) gradient. Scale bar is 200 $\mu$ m.

Figure S2

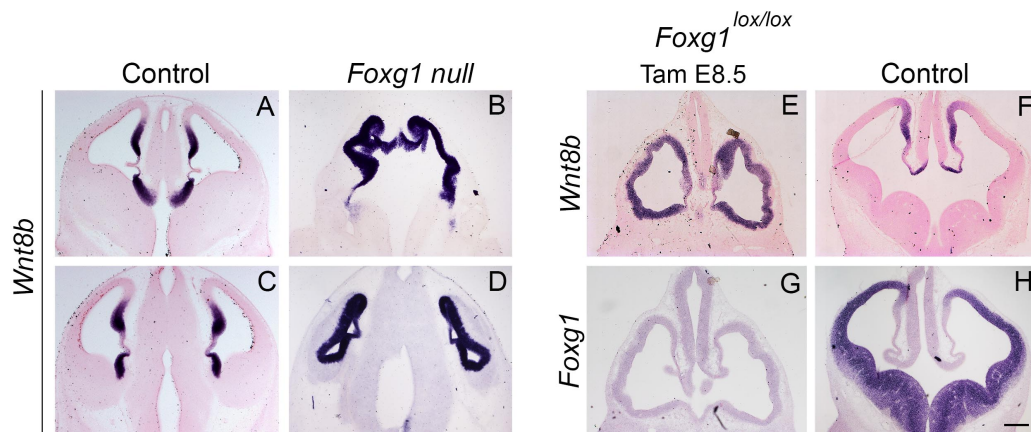

**Figure S2: Medial fates occupy the entire telencephalon in the absence of *Foxg1***

(A-D); *Wnt8b* expression at E12.5 in control brains is limited to the medial telencephalon (A,C) whereas in *Foxg1* null mutant brains (B,D) it encompasses the entire telencephalic neuroepithelium. Two levels of sectioning are shown corresponding to (A,B) and (C,D) respectively. (E-H); When tamoxifen (Tam) is administered at E8.5 to *CreERT2; Foxg1*<sup>lox/lox</sup> mice, a similar pan-telencephalic expression of *Wnt8b* is seen (E). An absence of *Foxg1* expression confirms near-complete recombination (G). The expression of *Wnt8b* and *Foxg1* in control littermates is shown in (F,H) respectively. Scale bar is 200µm.

Figure S3

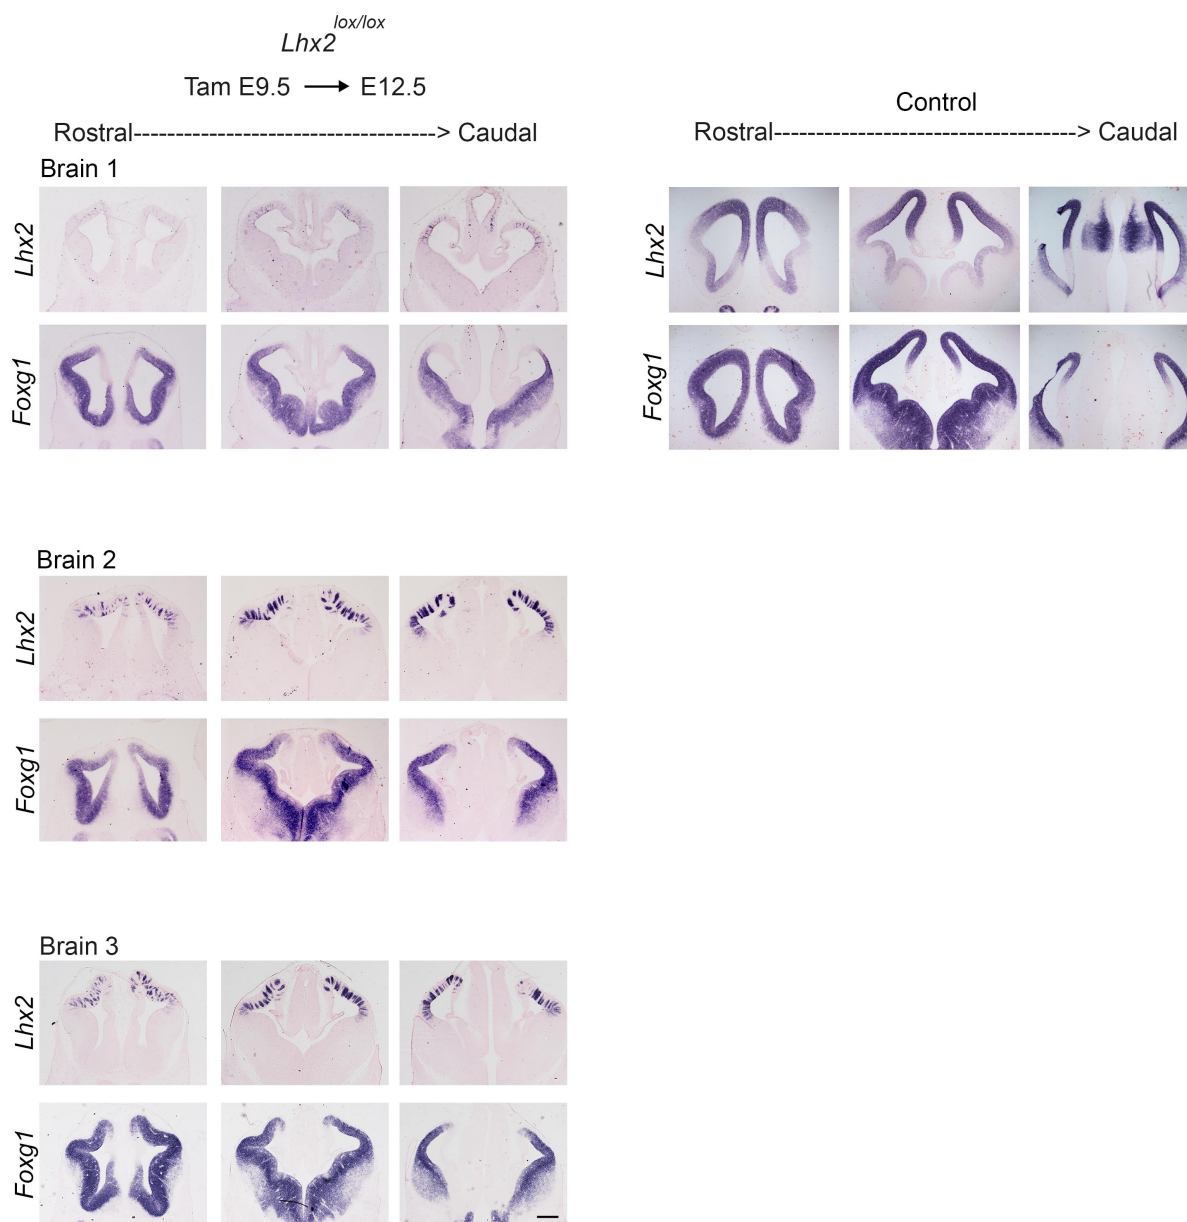

**Figure S3: *Foxg1* expression is unaltered when *Lhx2* is removed from E9.5** (Additional embryos corresponding to Figure 2 C,D)

Tamoxifen (Tam) was administered at E9.5 to control and *CreERT2; Lhx2<sup>lox/lox</sup>* embryos and brains were harvested at E12.5. Sections from three embryos are presented showing the rostro-caudal expression profiles of *Foxg1* in *Lhx2* conditional mutants. Patches of *Lhx2* expression corresponding to regions that escaped recombination are detected using a probe specific to the floxed exon. The control panel on the right shows the normal rostro-caudal expression profiles of *Foxg1* and *Lhx2*. Scale bar is 200µm.

Figure S4

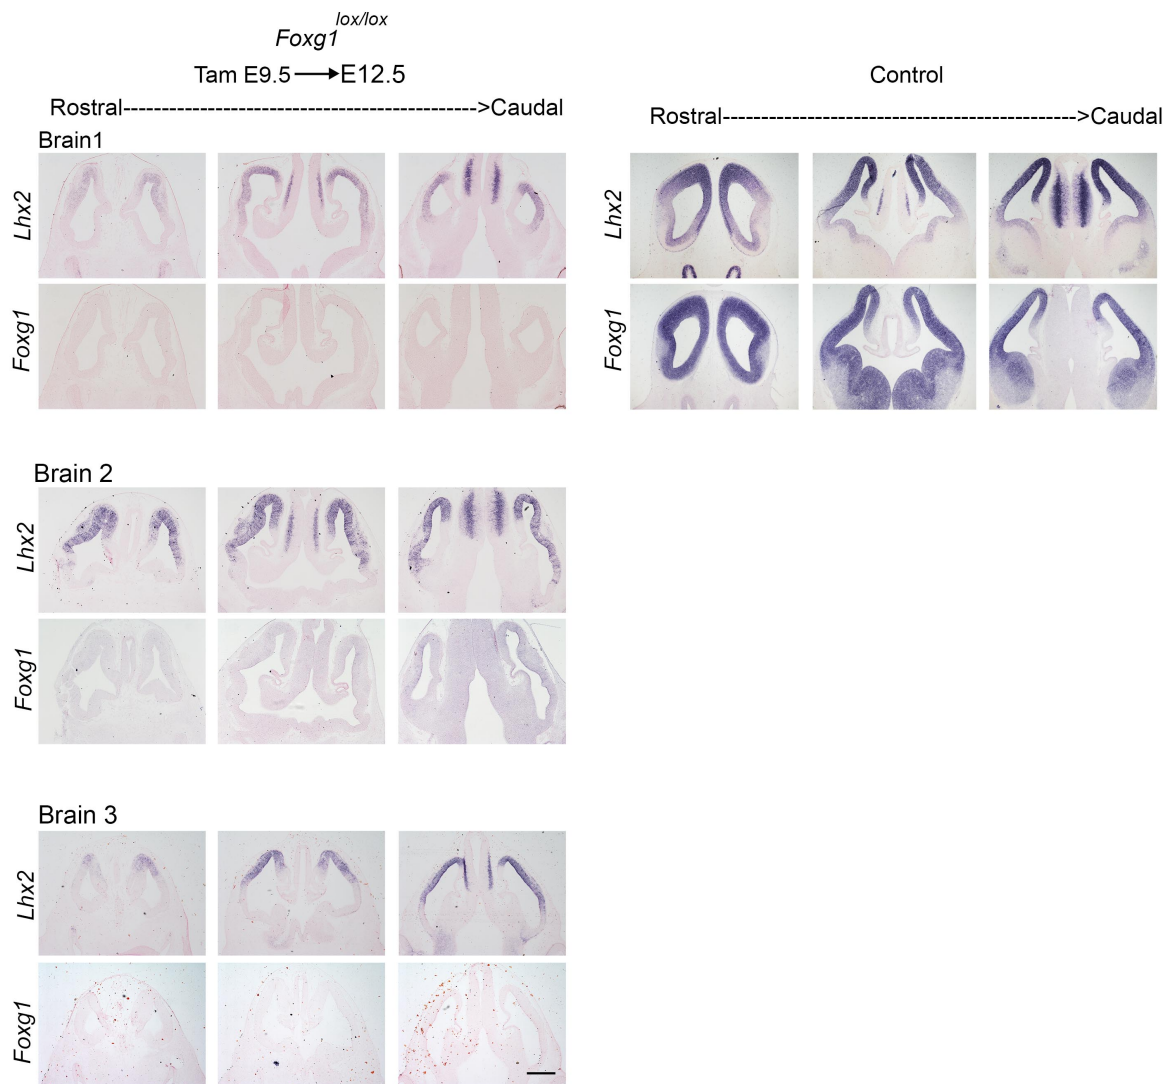

**Figure S4: *Lhx2* expression is reduced in the absence of *Foxg1*** (Additional embryos corresponding to Figure 2 E,F)

Tamoxifen (Tam) was administered at E9.5 to control and *CreERT2; Foxg1<sup>lox/lox</sup>* embryos and brains were harvested at E12.5. Panels shows sections from three embryo brains displaying the rostro-caudal expression profiles of *Lhx2* in *Foxg1* conditional mutants; In serial sections, a probe against *Foxg1* reveals near-complete recombination since the expression is undetectable. Scale bar is 200µm.

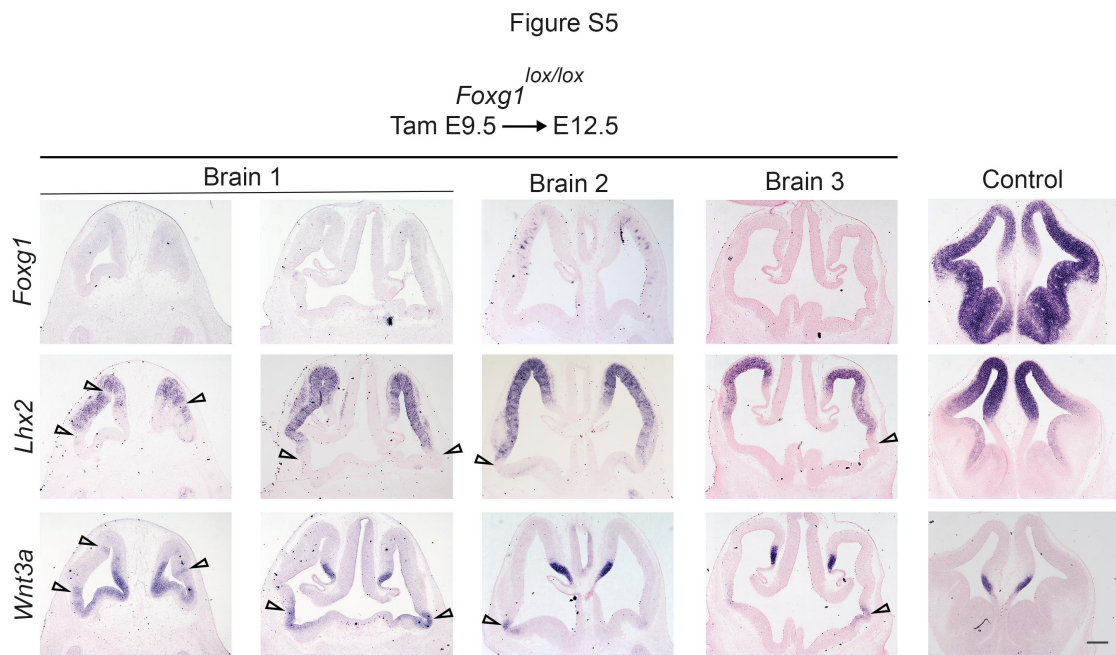

**Figure S5: Additional embryos corresponding to Figure 3 (D-F)** in which tamoxifen was administered to *CreERT2; Foxg1<sup>lox/lox</sup>* embryos at E9.5 and brains were harvested at E12.5. Scale bar is 200 $\mu$ m.

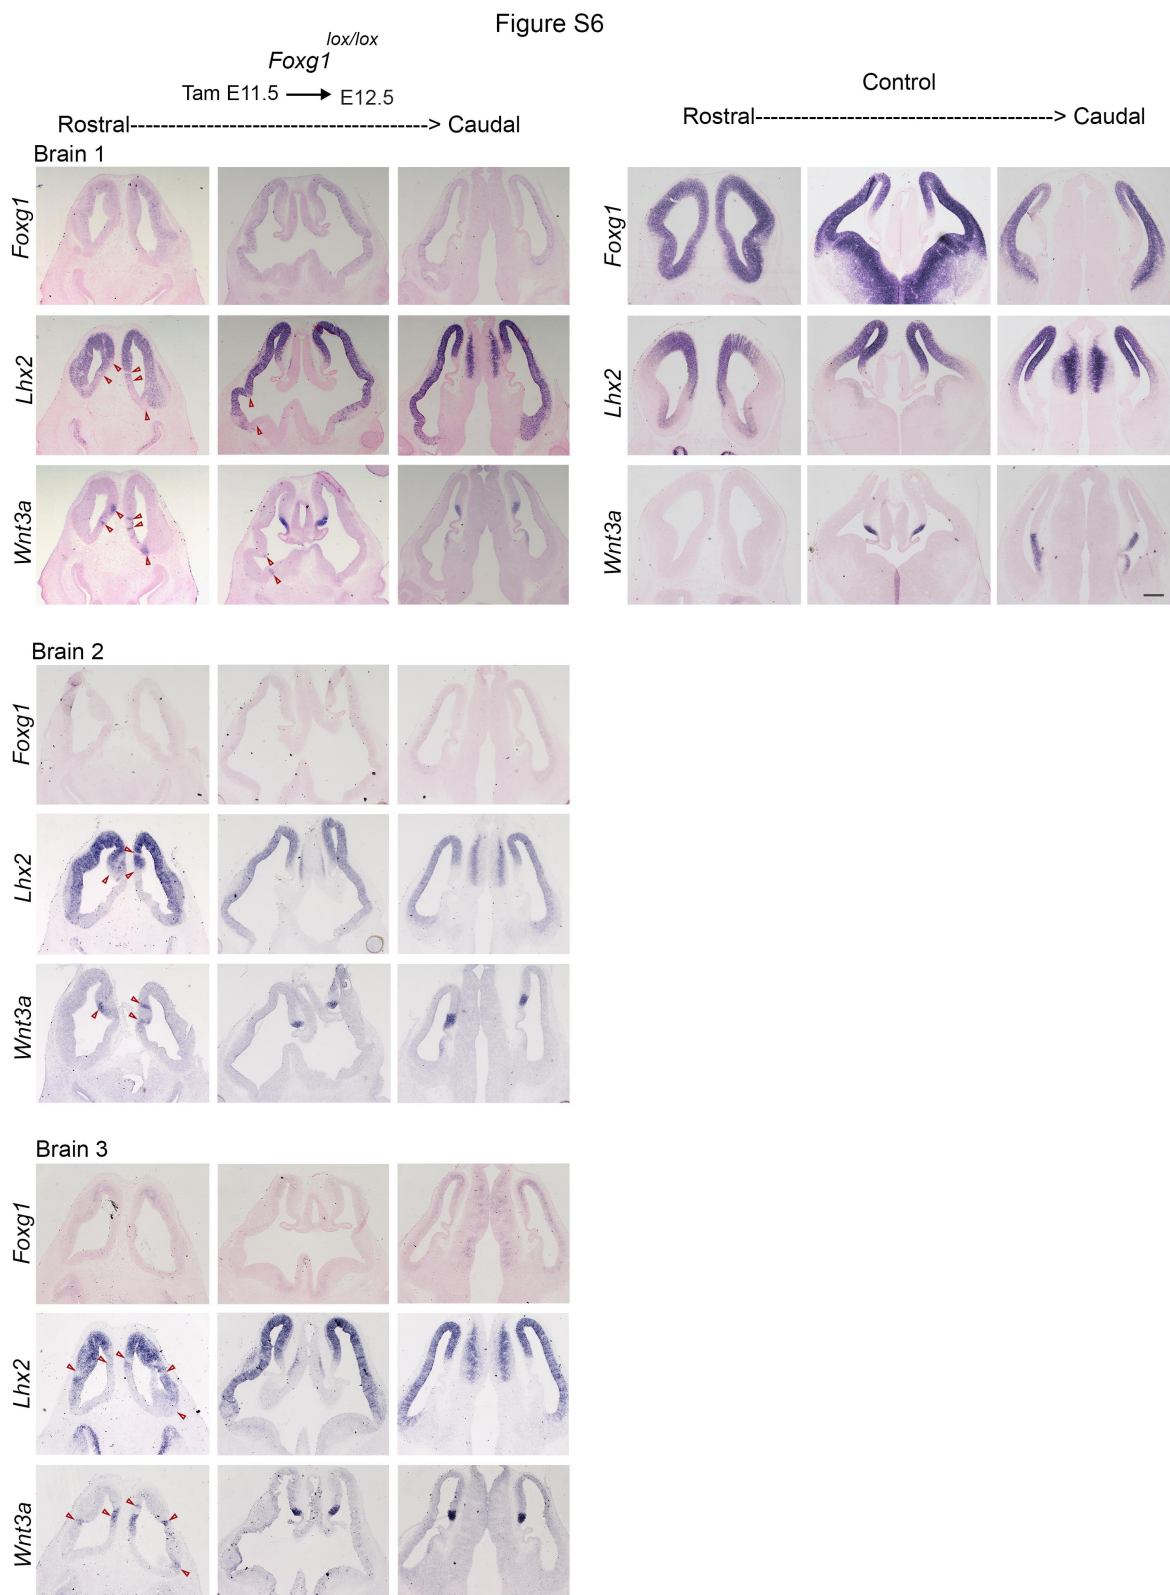

**Figure S6: Additional embryos corresponding to Figure 3 (G-I)** in which tamoxifen was administered to *CreERT2; Foxg1<sup>lox/lox</sup>* embryos at E11.5 and brains were harvested at E12.5. Scale bar is 200 $\mu$ m.

Figure S7

Tamoxifen E12.5; Harvest E14.5

*Foxg1*<sup>lox/lox</sup>

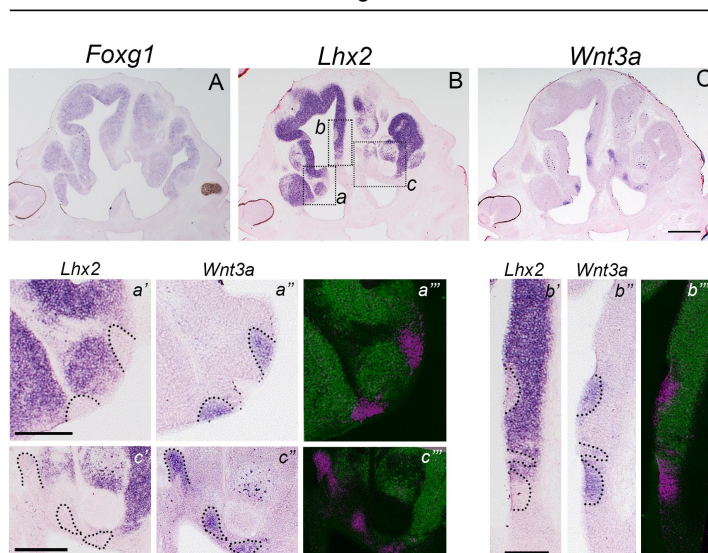

**Figure S7: An additional embryo corresponding to Figure 3 (J-L)** in which tamoxifen was administered to *CreERT2; Foxg1*<sup>lox/lox</sup> embryos at E12.5 and brains were harvested at E14.5. (A-C) shows the expression of *Foxg1* (A), *Lhx2* (B), and hem marker *Wnt3a* (C), in *Foxg1* conditional mutant brains. Corresponding regions of B and C marked by rectangles a and b are compared using false-color overlays (a'-a''' and b'-b''') demonstrating that *Wnt3a* appears in *Lhx2*-negative patches (identified by dotted lines). Scale bar is 400µm for A-C; 200µm for a'-a''', c'-c''' and 100µm for b'-b'''.

Figure S8

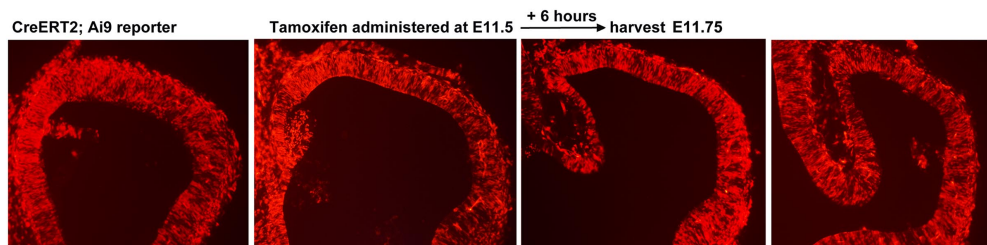

**Figure S8: Timing of tamoxifen action in the dorsal telencephalon:**

Tamoxifen was administered to pregnant dams carrying the Ai9 reporter allele, at E11.5, and the embryos were harvested 6 hours later (E11.75). The Ai9 reporter is robustly expressed all over the telencephalon, indicating that Cre action is well underway 6 hours post tamoxifen administration in this tissue.



Supplementary Table 1

| Loss of <b>Lhx2</b> From (stage) | Hem                                             | Cortical primordium                                    | Antihem                         | Ventral telencephalon           | Reference                       | Schematic Control                                                                   |
|----------------------------------|-------------------------------------------------|--------------------------------------------------------|---------------------------------|---------------------------------|---------------------------------|-------------------------------------------------------------------------------------|
| E8.5 or earlier                  | expanded; <i>Foxg1</i> not expressed            | not present                                            | expands; <i>Foxg1</i> expressed | present; <i>Foxg1</i> expressed | Mangale et al, 2008; this study |  |
| E9.5                             | expanded marginally; <i>Foxg1</i> not expressed | present medially; <i>Foxg1</i> expressed               | expands; <i>Foxg1</i> expressed | present; <i>Foxg1</i> expressed | this study                      |  |
| E10.5 or later                   | no expansion                                    | present medially and laterally; <i>Foxg1</i> expressed | no expansion                    | present; <i>Foxg1</i> expressed | this study                      |  |

  

| Loss of <b>Foxg1</b> From (stage) | Hem                                                                         | Cortical primordium                            | Antihem     | Ventral telencephalon                                          | References                                  | Schematic Control                                                                   |
|-----------------------------------|-----------------------------------------------------------------------------|------------------------------------------------|-------------|----------------------------------------------------------------|---------------------------------------------|-------------------------------------------------------------------------------------|
| E8.5 or earlier                   | expanded and seen in ectopic patches; <i>Lhx2</i> lost in the same patches  | only medial cortical primordium present        | not present | specified but undergoes cell death and is not present by E12.5 | Muzio and Mallamaci, 2005                   |  |
| E9.5                              | expanded (or seen in ectopic patches); <i>Lhx2</i> lost in the same patches | only medial cortical primordium present        | not present | specified but undergoes cell death and is not present by E12.5 | this study, Xuan et al 1995, Huh et al 1999 |  |
| E10.5 or later                    | expanded (or seen in ectopic patches); <i>Lhx2</i> lost in the same patches | medial and lateral cortical primordium present | not present | some ventral tissue appears to be present at E12.5             | this study                                  |  |
